# Supplementary material
Source: publisher figshare collection journal article supplement (https://gsajournals.figshare.com/ndownloader/files/13273841)
Supplement: Supplementary file 1 [file 13273841]

|  | Number of H3K4me3 peaks predicted to be under trans regulation | | |
| --- | --- | --- | --- |
| Strain | Cardiomyocytes | Hepatocytes | mESCs |
| BXD75 | 274 | 1083 | 2525 |
| BXD87 | 1229 | 1139 | 1838 |
| overlap | 153 | 598 | 711 |

**Table S5.** Summary of *cis*/*trans* test for BXD75 and BXD87 in hepatocytes, cardiomyocytes, and mESCs.
